# Supplementary material for: Computational Studies on Selected Macrolides Active against Escherichia coli Combined with the NMR Study of Tylosin A in Deuterated Chloroform
Source: MDPI journal article supplement (doi:10.3390/molecules27217280), 2022-10-26
Supplement: s1 [file s1]

| Contact                    | NMR spectrum (label and tolerance level of distances in Å) | Modelling (distances in Å) |        |
|----------------------------|------------------------------------------------------------|----------------------------|--------|
|                            |                                                            | MM2                        | AMBER* |
| 4-18                       | M (2.3±0.5)                                                | 2.13                       | 2.13   |
| 6-19s                      | V (3.5±1.5)                                                | 2.52                       | 3.02   |
| 8-7s                       | S (2.5±1.0)                                                | 2.49                       | 2.55   |
| 8-7r                       | S (2.5±1.0)                                                | 3.05                       | 3.05   |
| 8-21                       | S (2.5±1.0)                                                | 2.15                       | 2.12   |
| 10-11                      | V (3.5±1.5)                                                | 3.10                       | 3.09   |
| 10-22                      | V (3.5±1.5)                                                | 5.98                       | 2.27   |
| 11-10                      | V (3.5±1.5)                                                | 3.10                       | 3.09   |
| 11-13                      | L (2.0±0.4)                                                | 3.39                       | 2.38   |
| 11-21                      | V (3.5±1.5)                                                | 5.05                       | 5.10   |
| 13-11                      | L (2.0±0.4)                                                | 3.39                       | 2.38   |
| 14-16s                     | S (2.5±1.0)                                                | 3.01                       | 3.84   |
| 14-22                      | M (2.3±0.5)                                                | 4.05                       | 2.61   |
| 14-23r                     | V (3.5±1.5)                                                | 3.02                       | 2.52   |
| 14-23s                     | L (2.0±0.4)                                                | 2.42                       | 2.34   |
| 15-13                      | V (3.5±1.5)                                                | 2.95                       | 3.77   |
| 15-17                      | V (3.5±1.5)                                                | 2.63                       | 2.75   |
| 16s-17                     | S (2.5±1.0)                                                | 2.16                       | 2.15   |
| 16s-14                     | S (2.5±1.0)                                                | 3.01                       | 3.84   |
| 17-15                      | V (3.5±1.5)                                                | 2.63                       | 2.75   |
| 19r-7s                     | S (2.5±1.0)                                                | 2.98                       | 2.34   |
| 19s-7r                     | S (2.5±1.0)                                                | 4.35                       | 3.12   |
| 21-7s                      | V (3.5±1.5)                                                | 2.55                       | 2.54   |
| 21-7r                      | V (3.5±1.5)                                                | 2.68                       | 2.86   |
| 4'-6'                      | M (2.3±0.5)                                                | 2.61                       | 2.51   |
| 1''-6''                    | S (2.5±1.0)                                                | 4.40                       | 4.43   |
| 4''-6''                    | M (2.3±0.5)                                                | 2.41                       | 2.53   |
| 5''-4''                    | S (2.5±1.0)                                                | 3.06                       | 2.51   |
| 6''-4''                    | M (2.3±0.5)                                                | 2.41                       | 2.53   |
| 1'''-3'''                  | V (3.5±1.5)                                                | 3.89                       | 2.45   |
| 2'''-1'''                  | M (2.3±0.5)                                                | 3.08                       | 2.47   |
| 2'''OCH <sub>3</sub> -1''' | S (2.5±1.0)                                                | 2.67                       | 3.99   |
| 2'''OCH <sub>3</sub> -3''' | S (2.5±1.0)                                                | 3.86                       | 4.46   |
| 4'''-1'''                  | S (2.5±1.0)                                                | 2.49                       | 3.93   |
| 6'''-1'''                  | S (2.5±1.0)                                                | 4.40                       | 4.43   |
| 6'''-2'''                  | V (3.5±1.5)                                                | 2.22                       | 4.07   |

Table S2: Distances obtained for tylosin A in chloroform using 2D ROESY NMR and molecular modelling; Symbols: L=Large, M=Medium, S=Small, V=Very small.

(a)

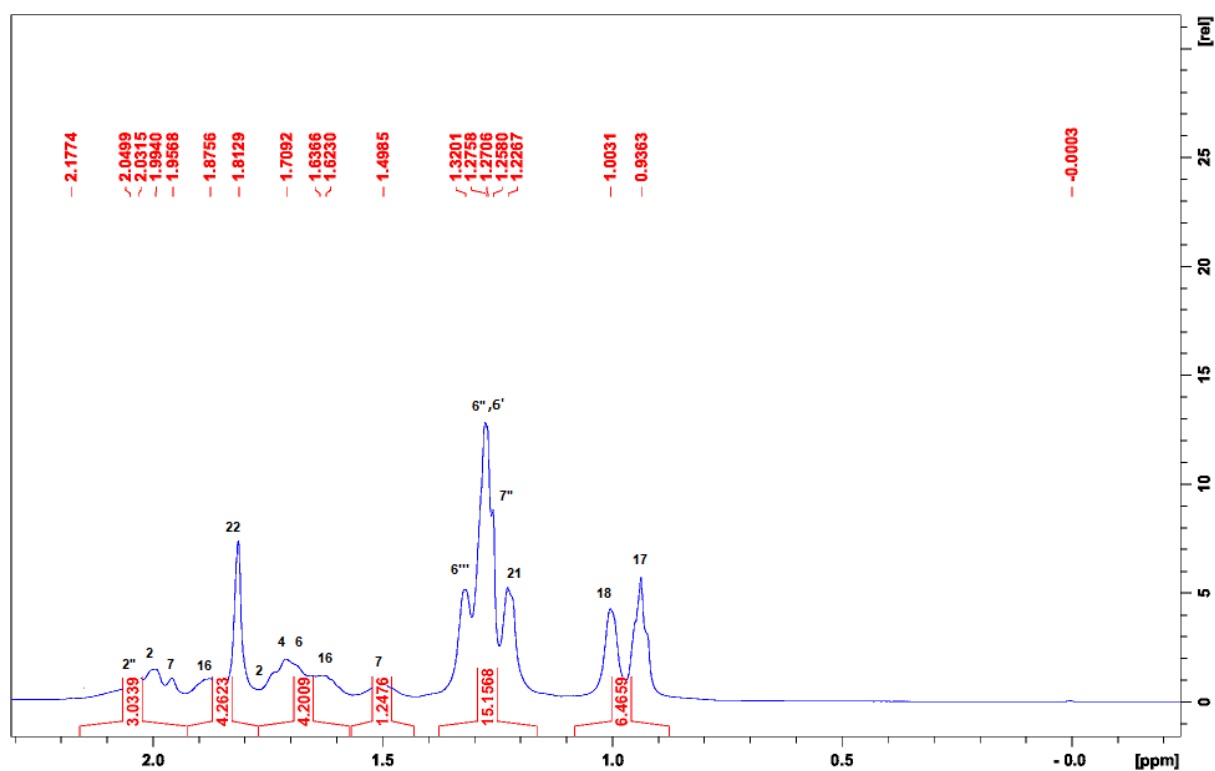

(b)

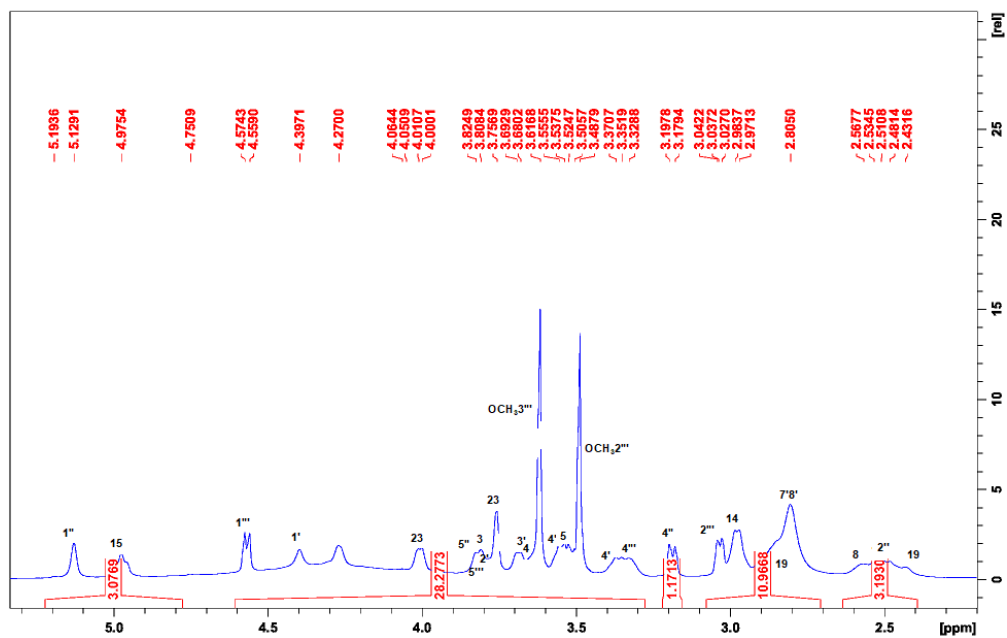

(c)

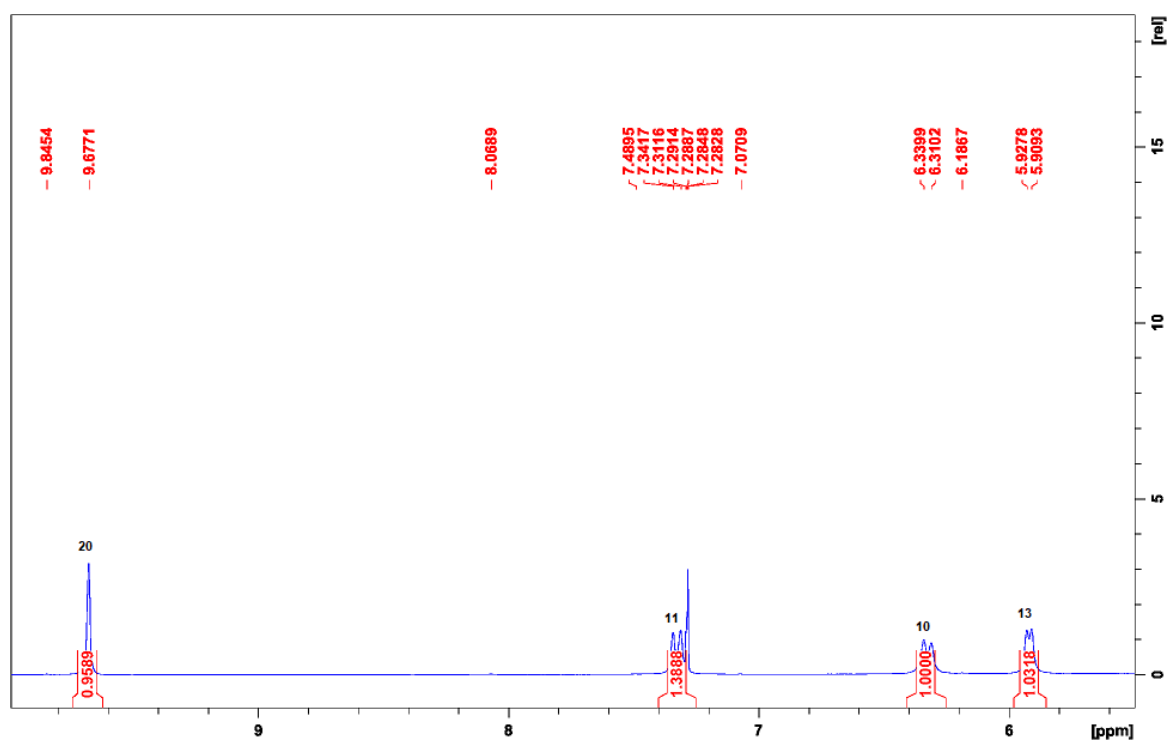

Figure S1: (a) Part of  $^1\text{H}$  NMR spectrum of tylosin A in  $\text{CDCl}_3$  from 0-2.3 ppm, (b) part of  $^1\text{H}$  NMR spectrum of tylosin A in  $\text{CDCl}_3$  from 2.3-5.3 ppm, (c) part of  $^1\text{H}$  NMR spectrum of tylosin A in  $\text{CDCl}_3$  from 5.6-9.8 ppm.

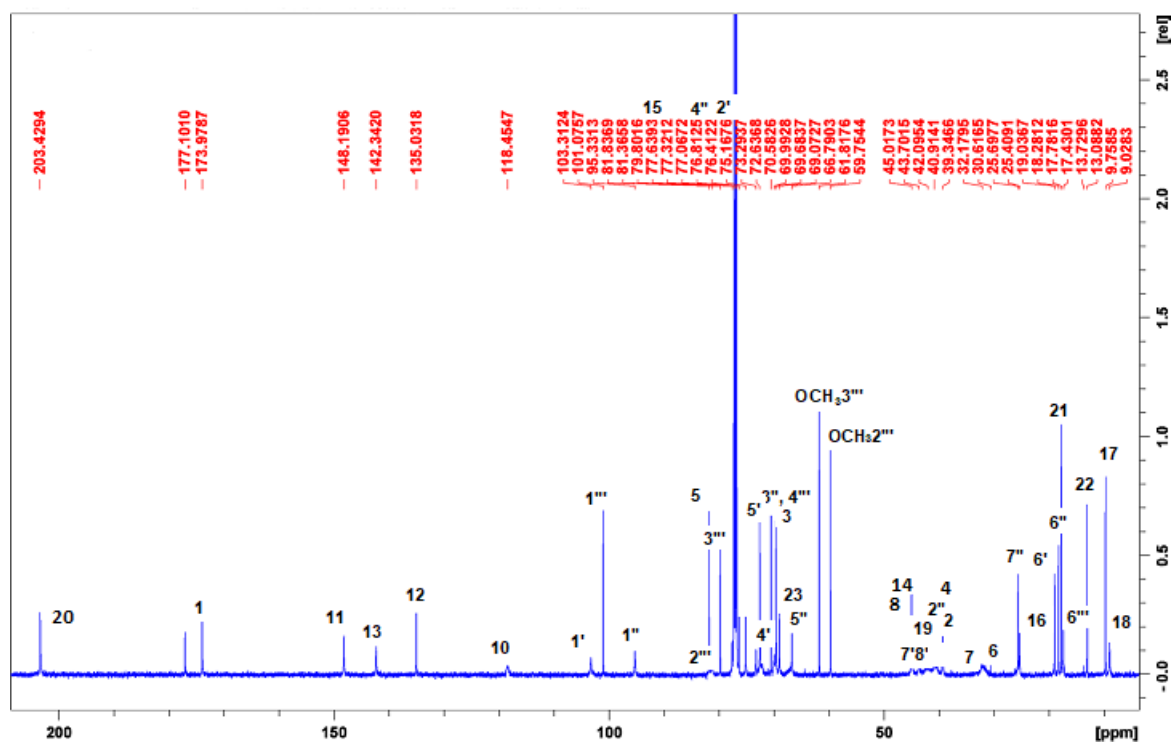

Figure S2:  $^{13}\text{C}$  NMR spectrum of tylosin A in  $\text{CDCl}_3$ .

(a)

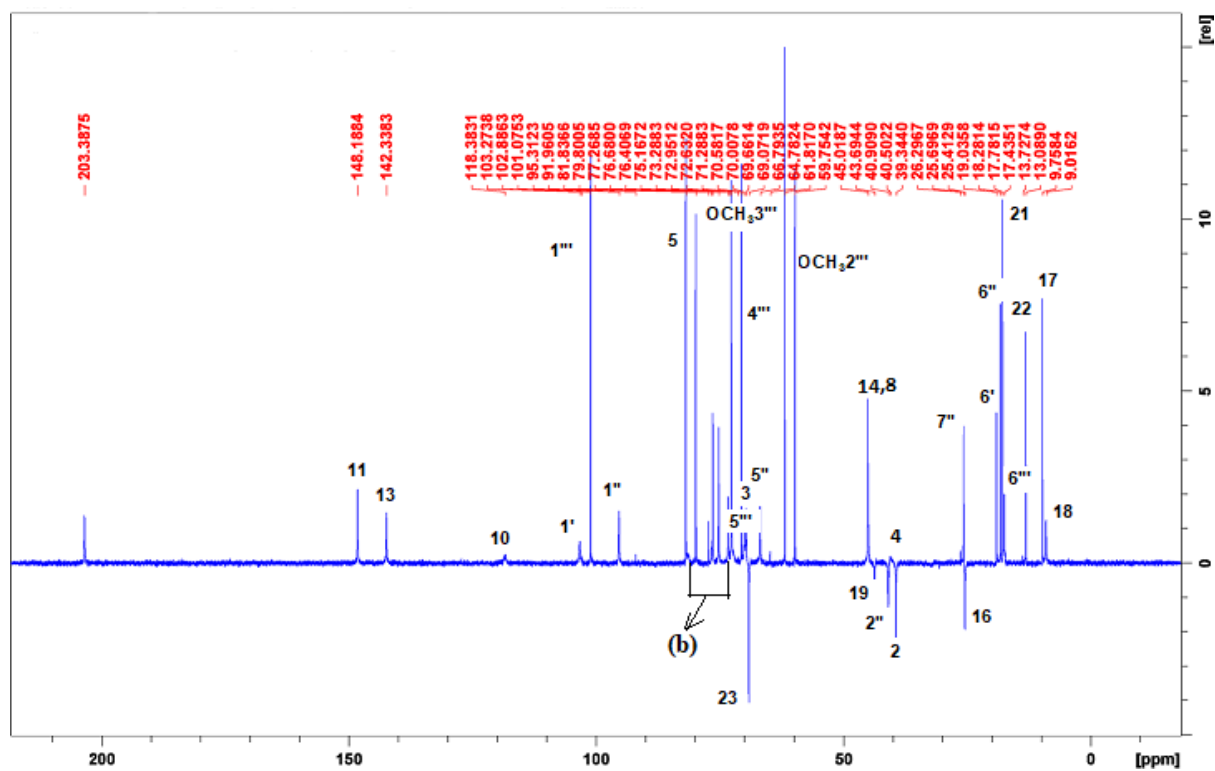

(b)

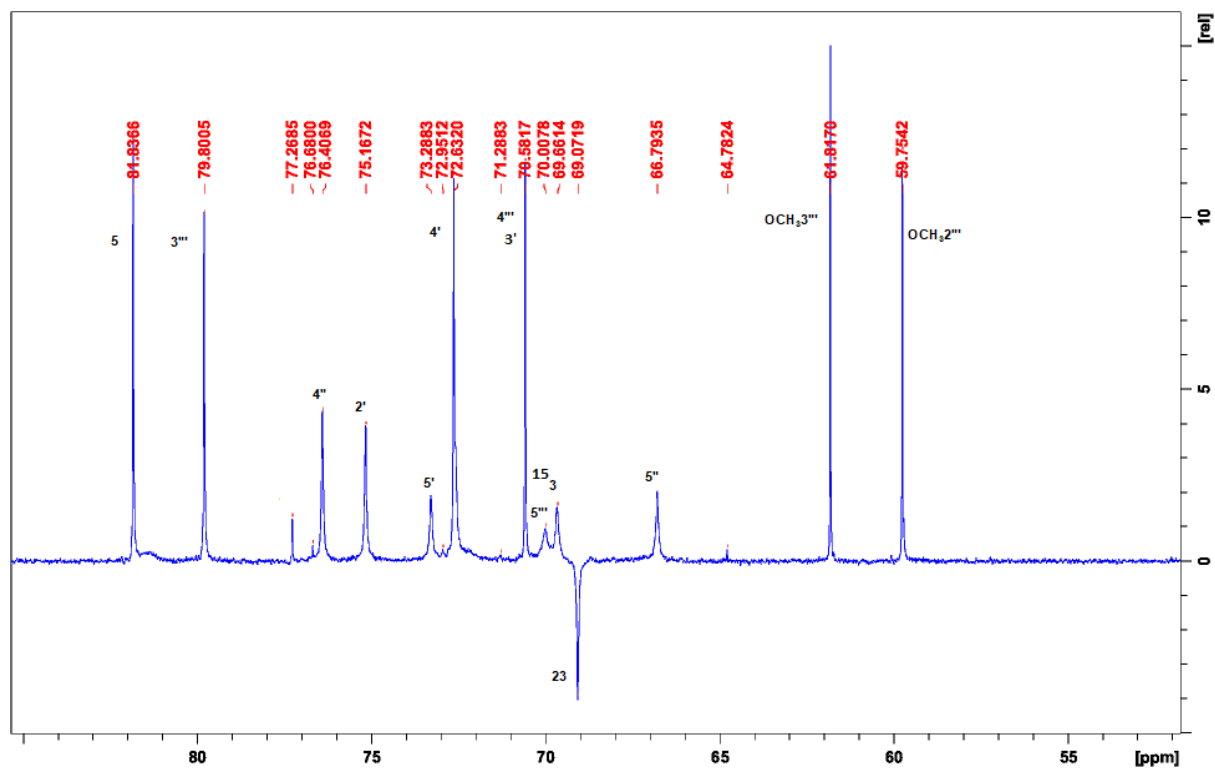

Figure S3: (a) <sup>13</sup>C DEPT 135 NMR spectrum of tylosin A in CDCl<sub>3</sub>, (b) enlarged <sup>13</sup>C DEPT 135 NMR spectrum of tylosin A in CDCl<sub>3</sub> from 55-90 ppm.

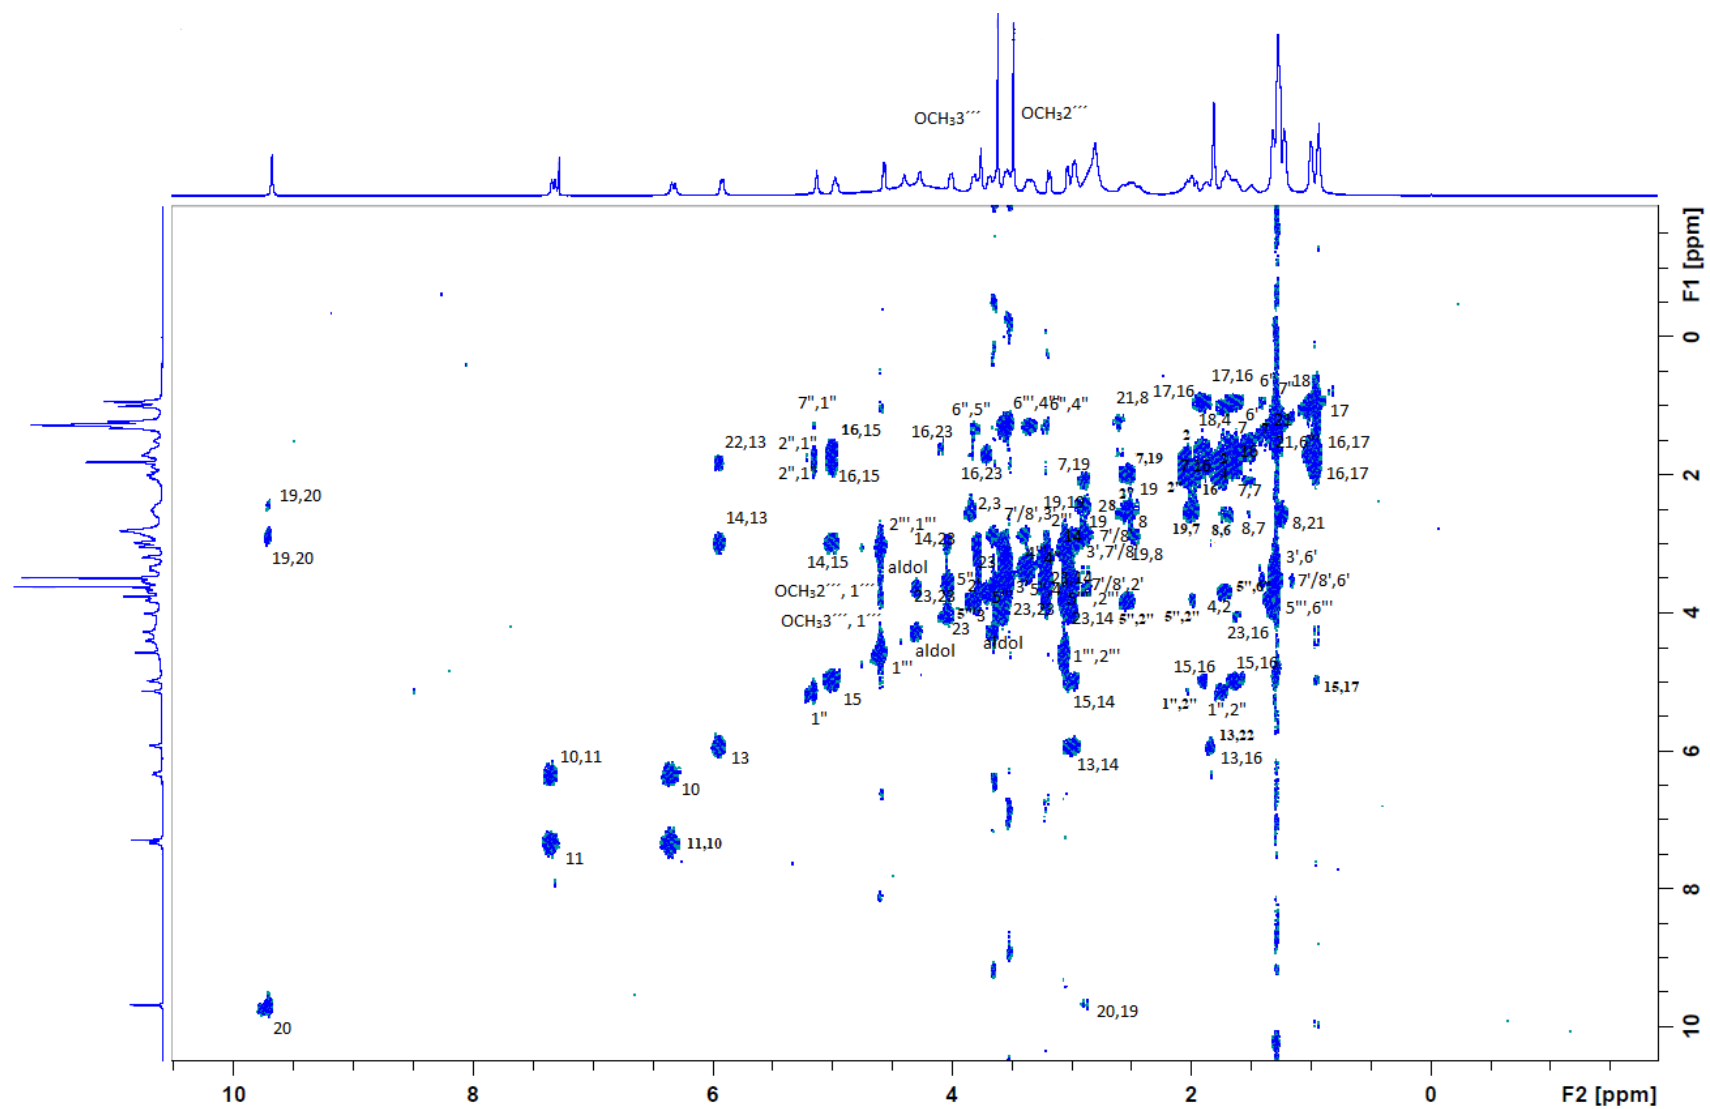

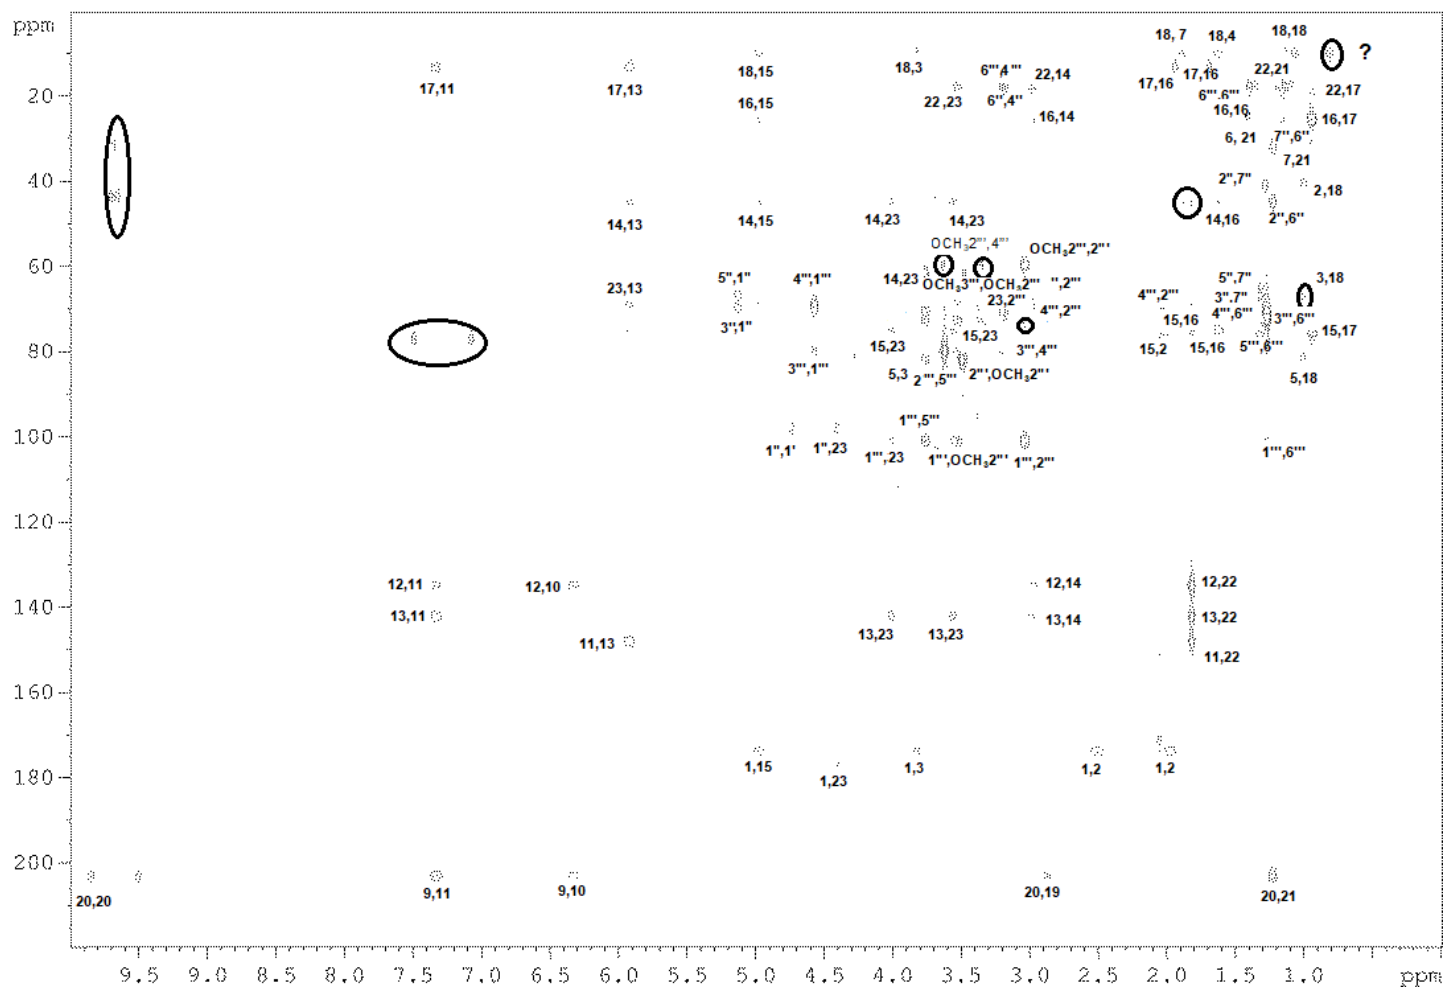

Figure S5: 2D HMBC NMR spectrum of tylosin A in  $\text{CDCl}_3$  showing interactions belonging to tylosin A, but also the additional signals tentatively assigned to the degradant tylosin aldol. Circled peaks are not real HMBC cross peaks of tylosin A or do not belong to this compound.

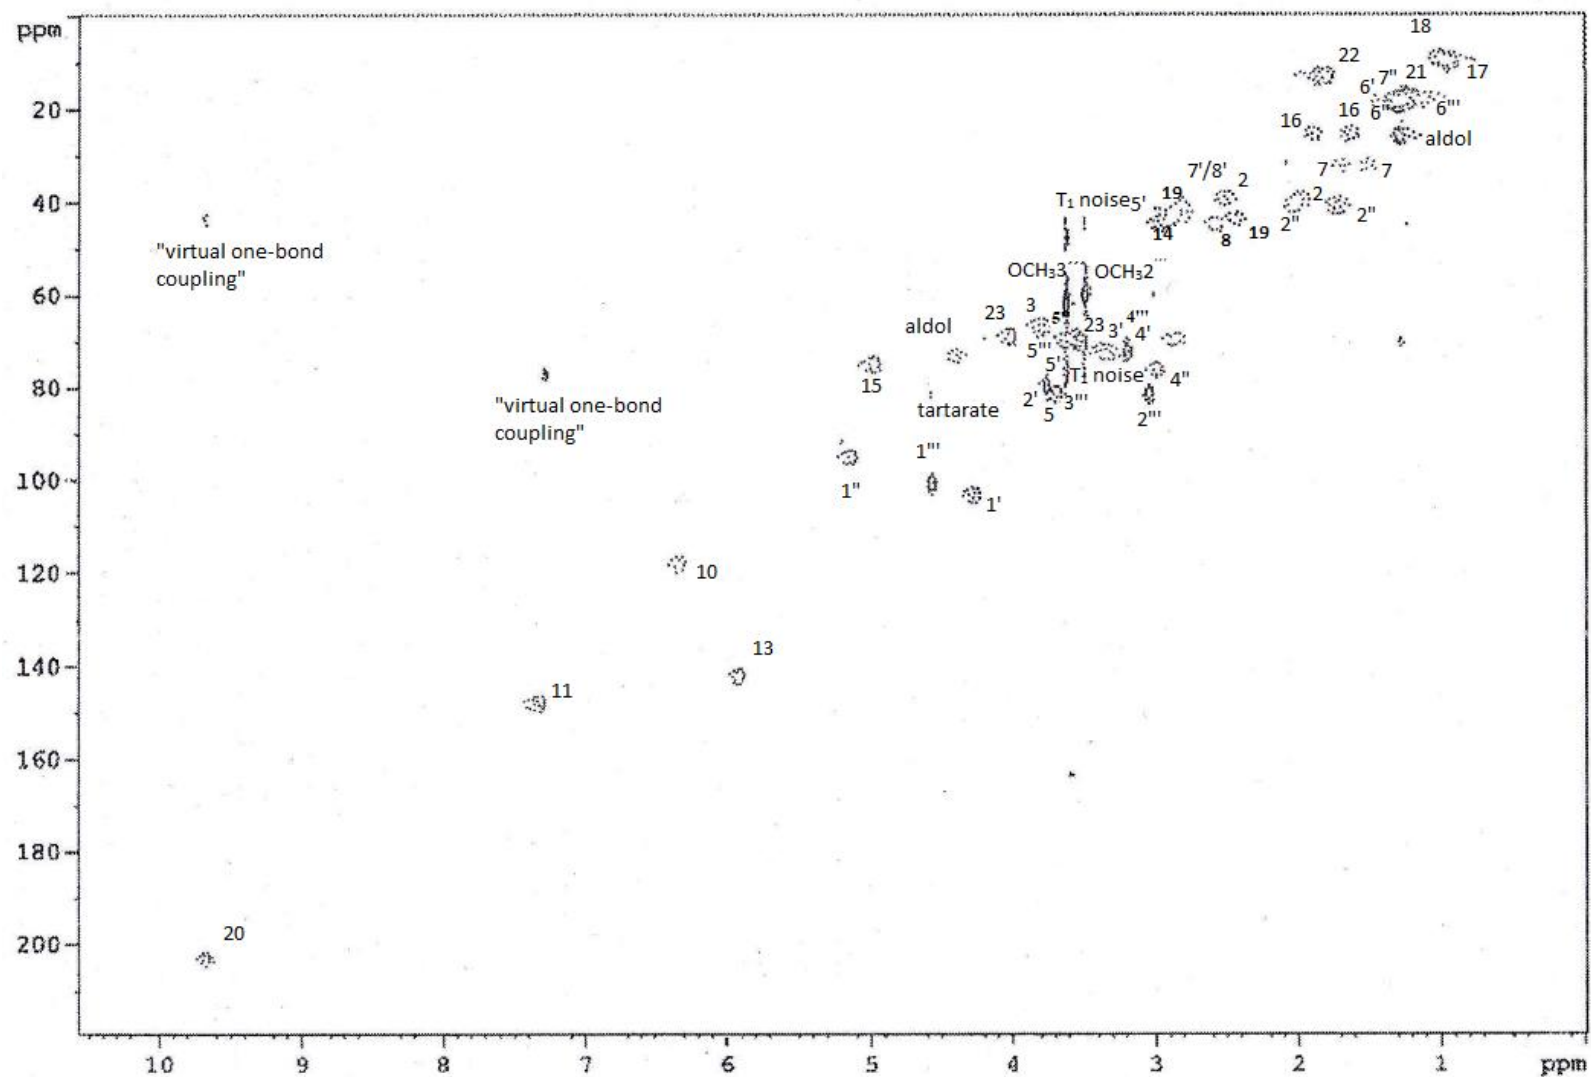

Figure S6: 2D HMQC NMR of tylosin A in  $\text{CDCl}_3$  showing interactions belonging to tylosin A, but also the additional signals tentatively assigned to the degradant tylosin aldol.



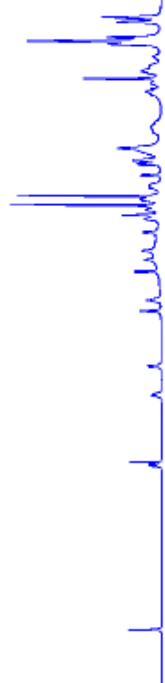

Figure S7: 2D ROESY NMR spectrum of tylosin A in  $\text{CDCl}_3$ .

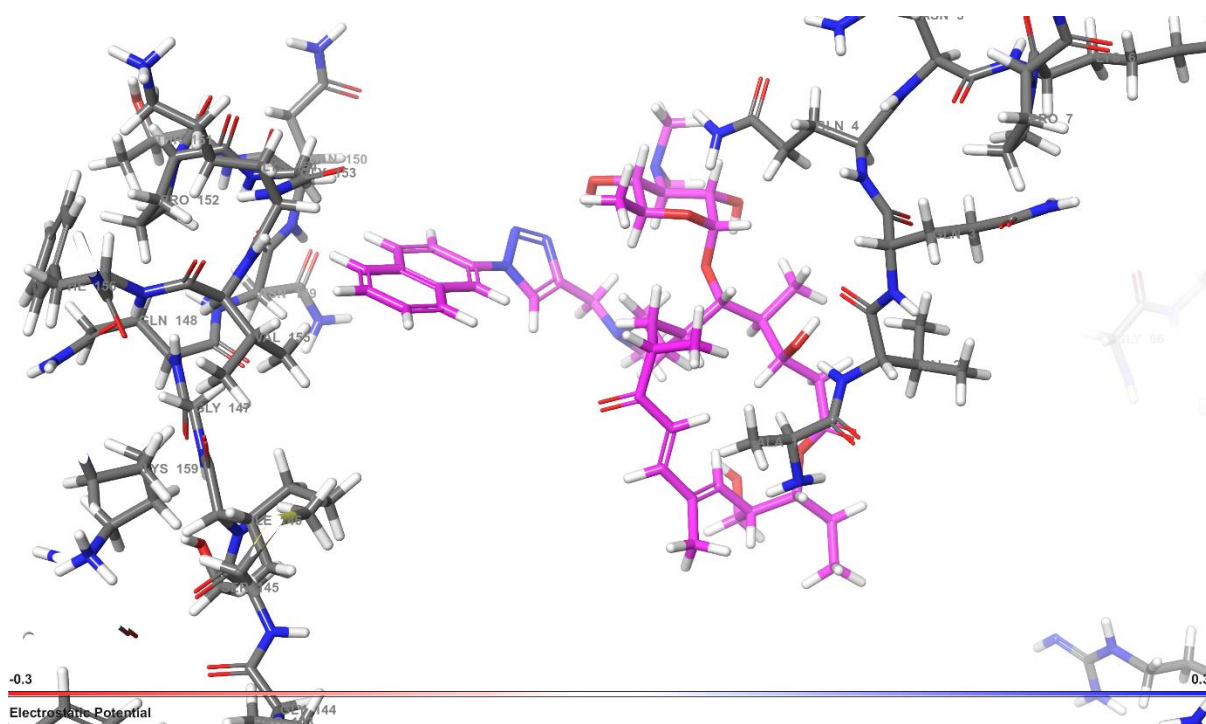

Figure S8: Interactions between (1) (pink) and the amino acids from chain B from *E. coli* ribosome.

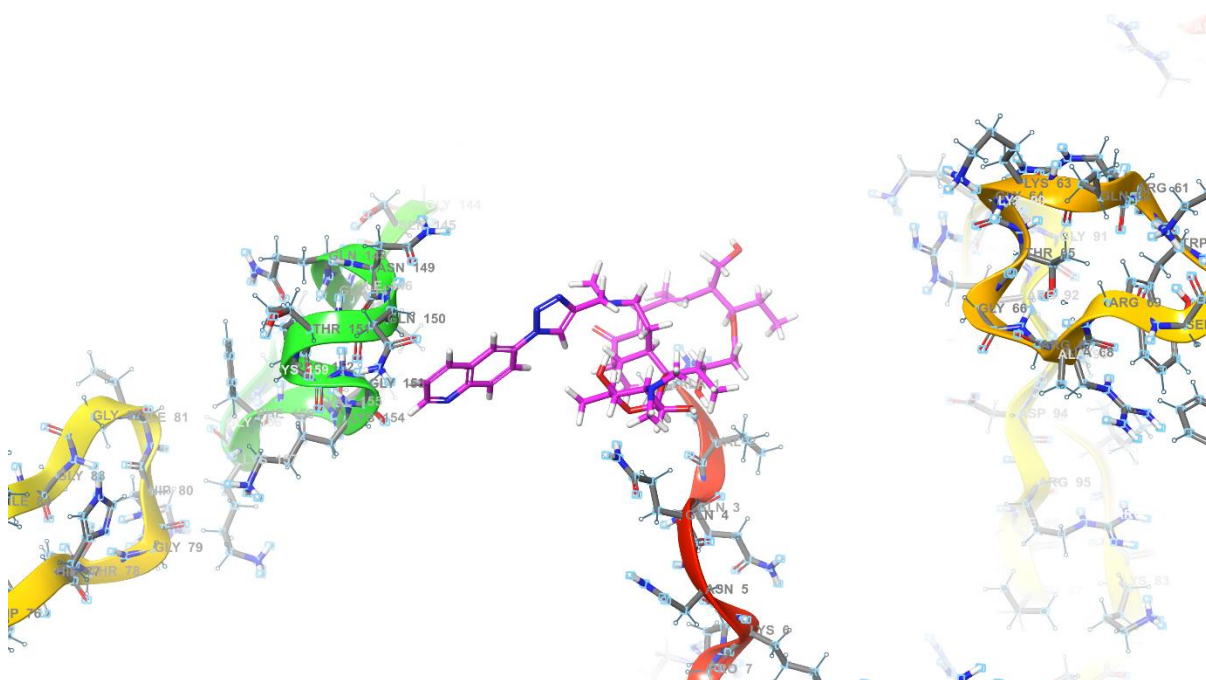

Figure S9: Interactions between (2) (pink) and the amino acids from chain B from *E. coli* ribosome.



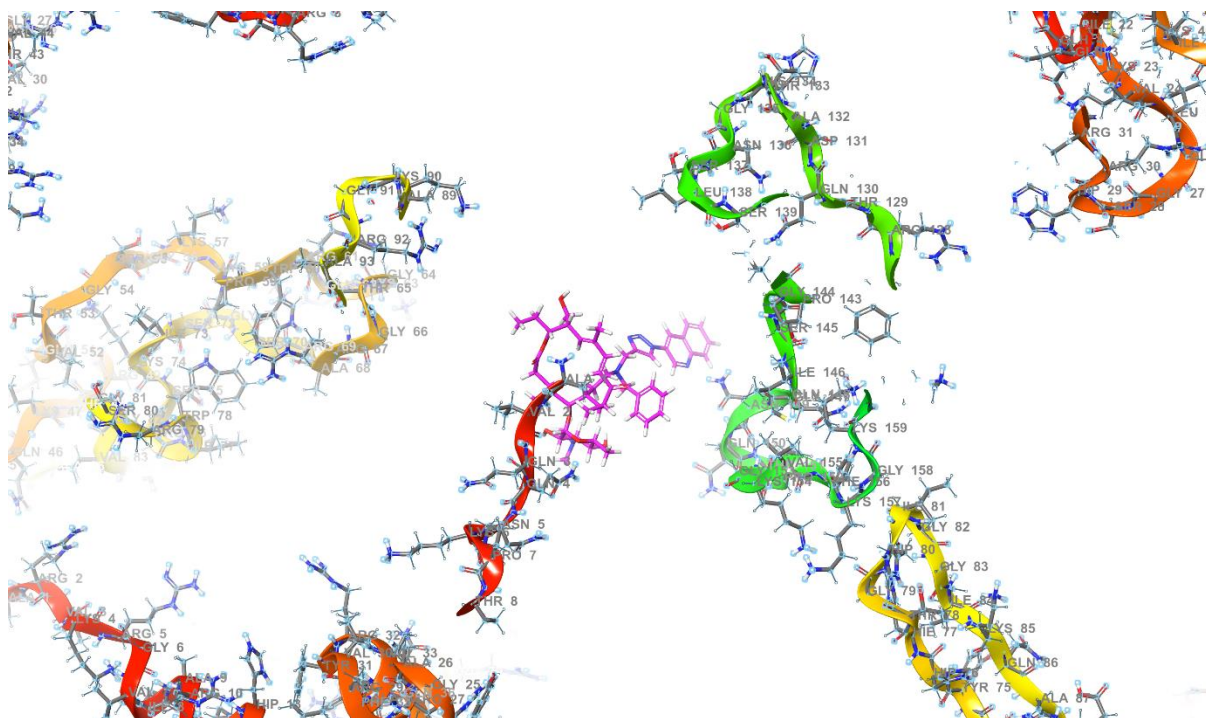

Figure S12: Interactions between (5) (pink) and the amino acids from chain B from *E. coli* ribosome

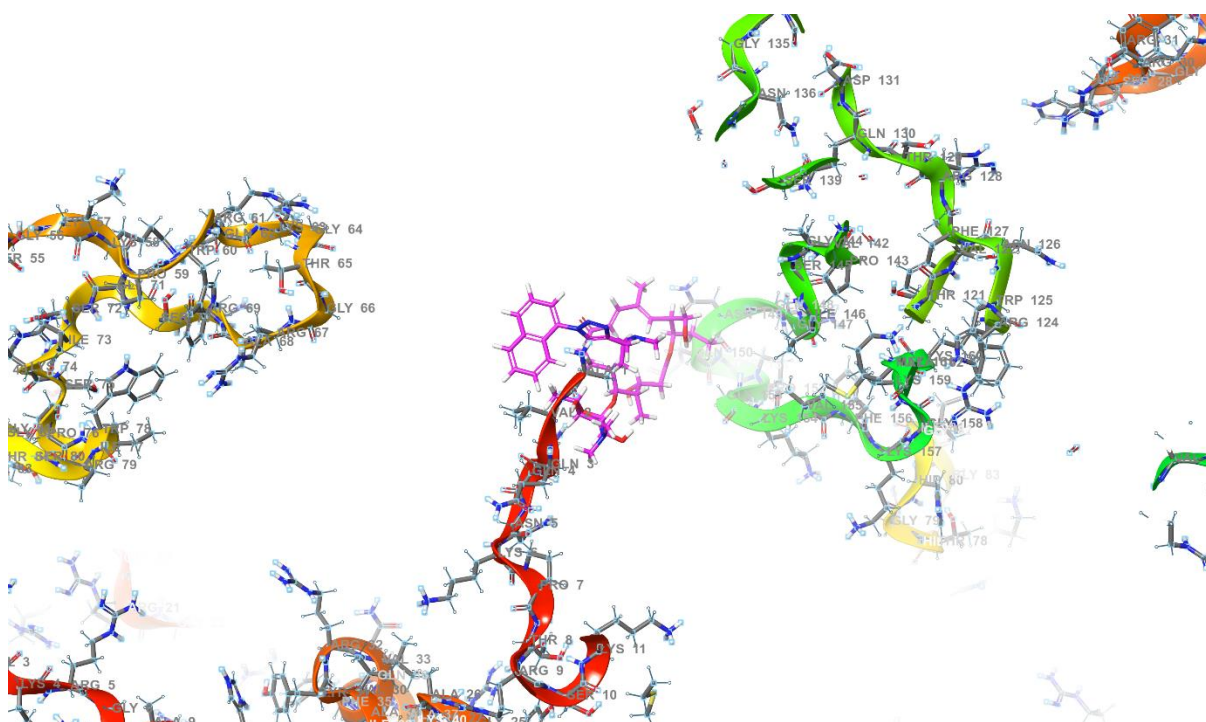

Figure S13: Interactions between (6) (pink) and the amino acids from chain B from *E. coli* ribosome.



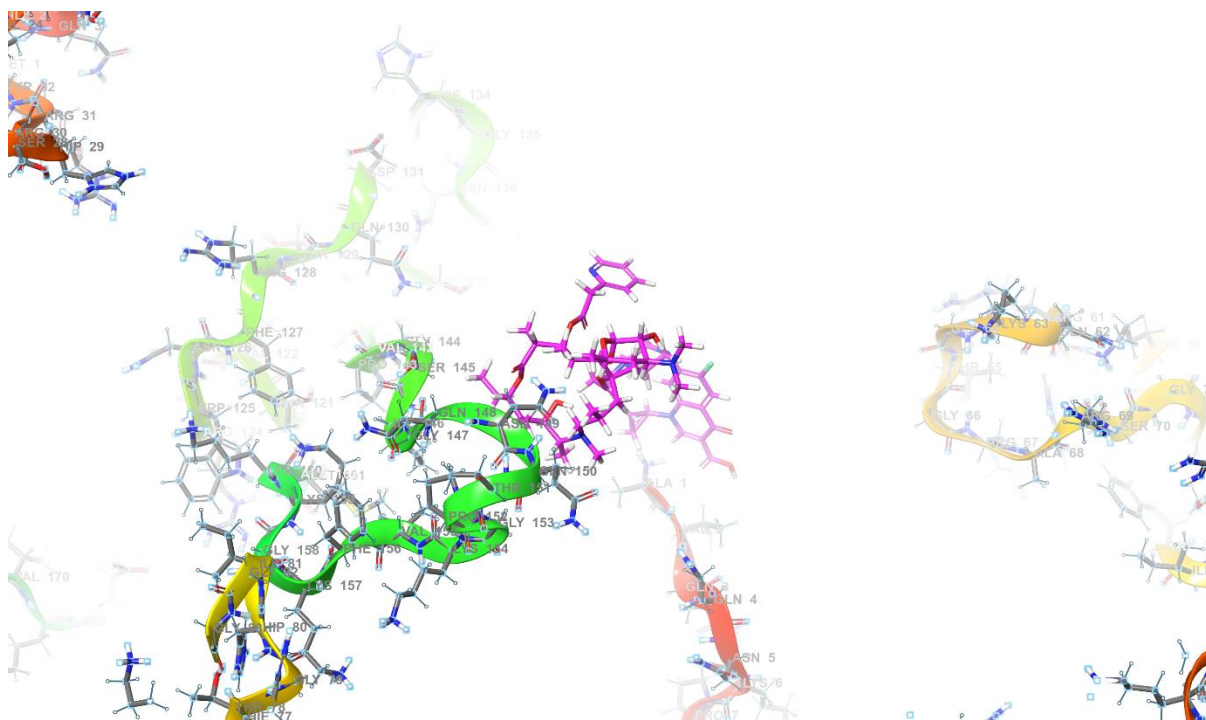

Figure S14: Interactions between **(7)** (pink) and the amino acids from chain B from *E. coli* ribosome.

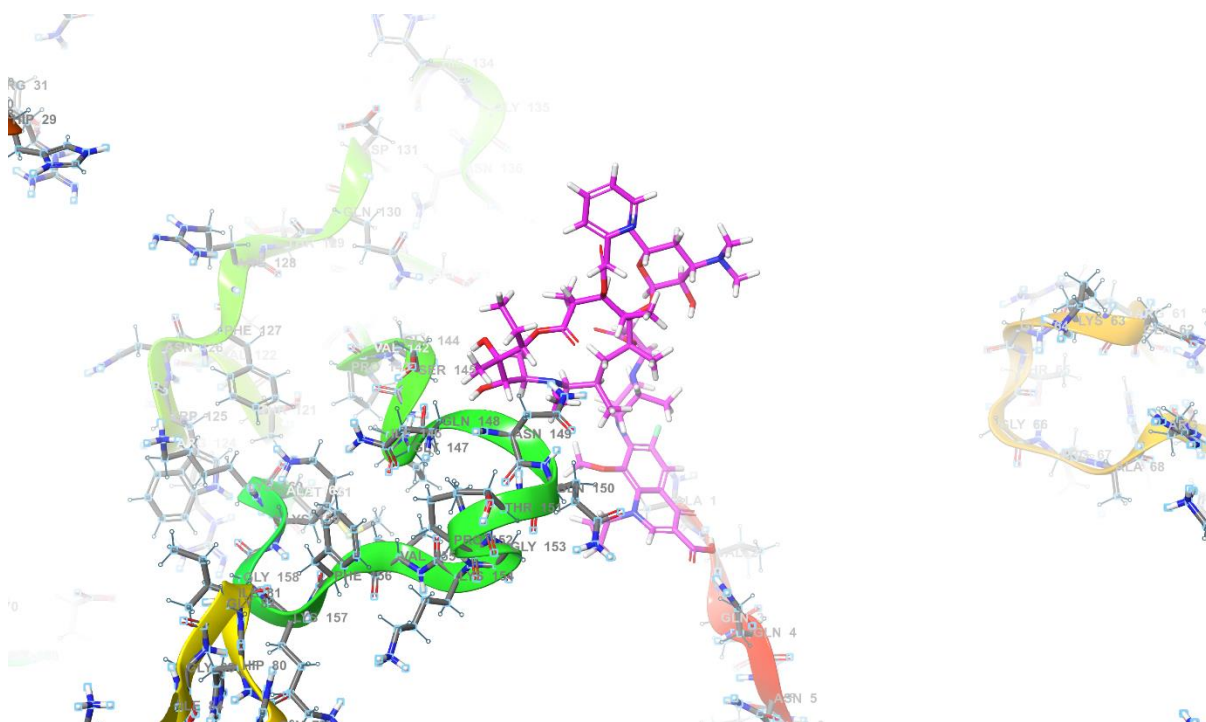

Figure S15: Interactions between **(8)** (pink) and the amino acids from chain B from *E. coli* ribosome.

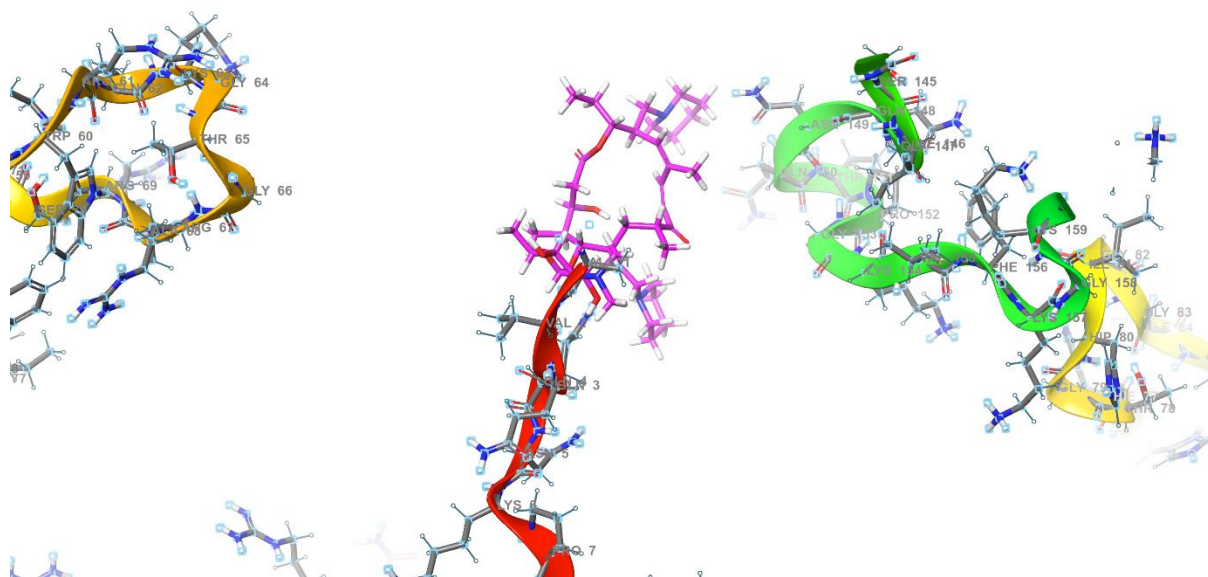

Figure S16: Interactions between tildipirosin (pink) and the amino acids from chain B from *E. coli* ribosome.

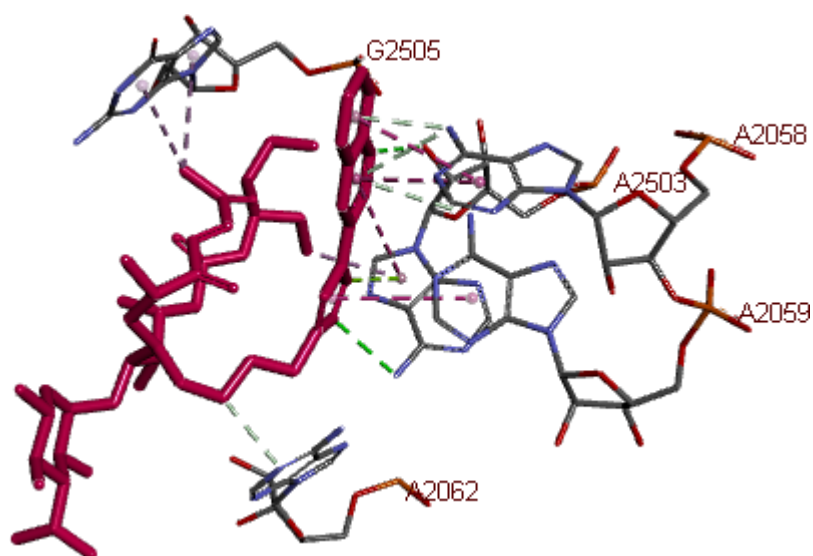

Figure S17: Interactions between (**3**) (red) and the nucleotides from the binding site from *E. coli* ribosome.

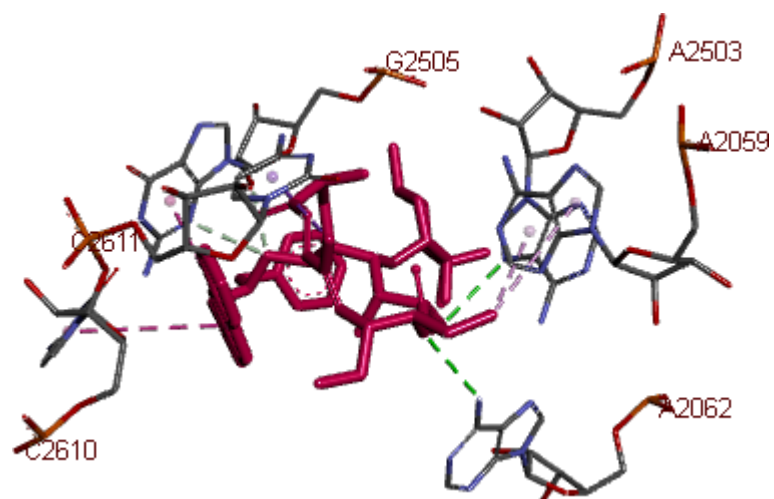

Figure S18: Interactions between (5) (red) and the nucleotides from the binding site from *E. coli* ribosome.

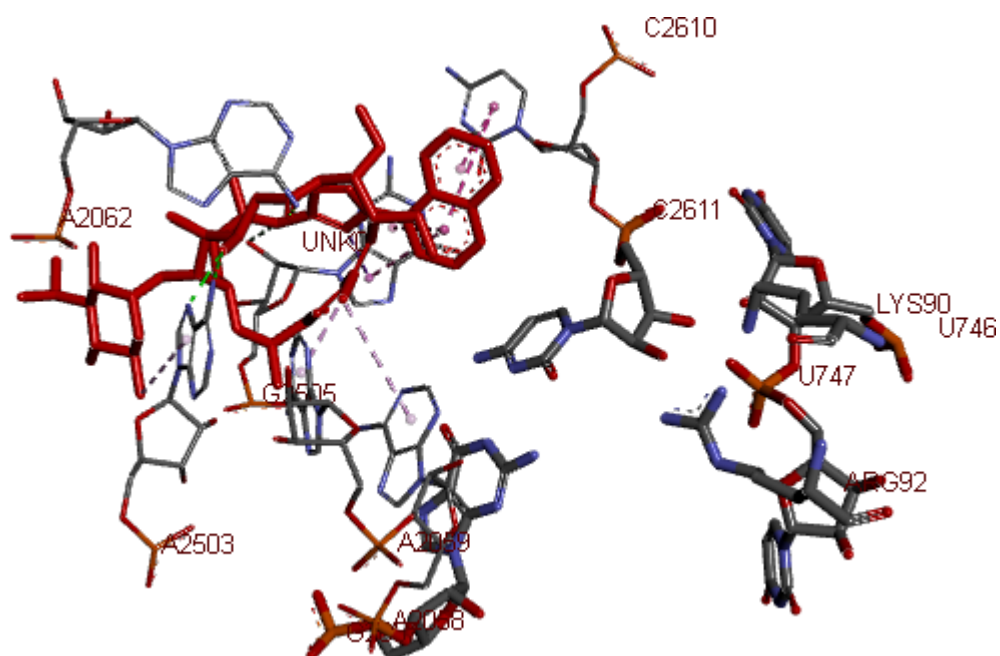

Figure S19: Interactions between (6) (red) and the nucleotides from the binding site from *E. coli* ribosome.

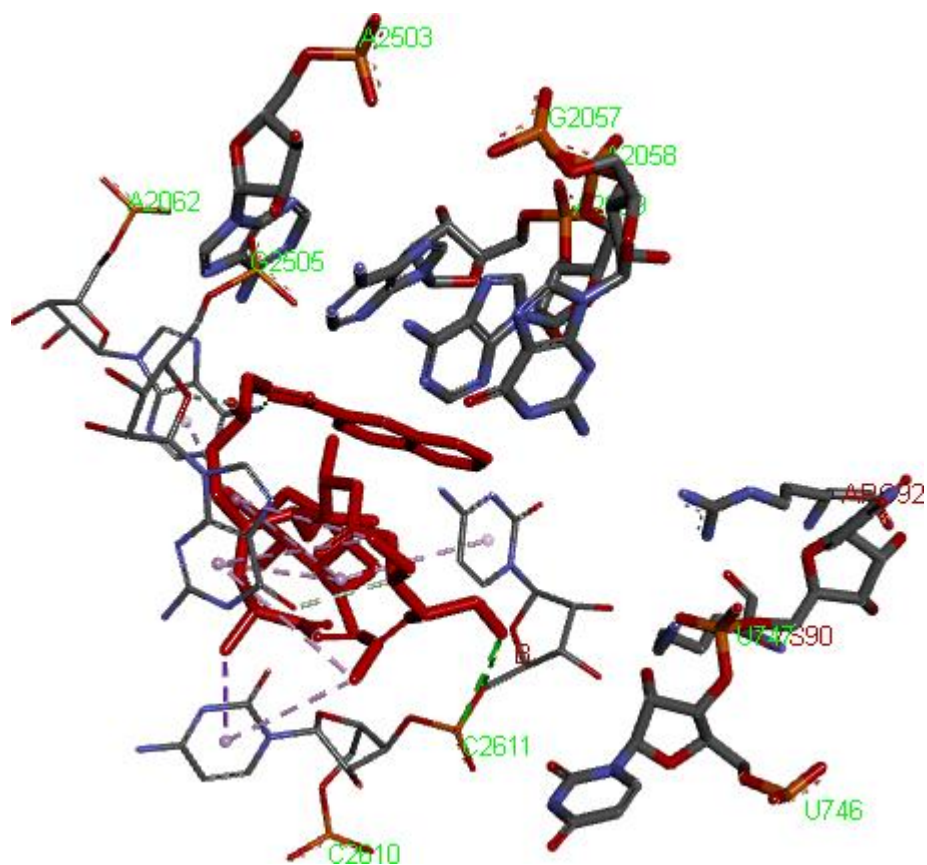

Figure S20: Interactions between (2) (red) and the nucleotides from the binding site from *E. coli* ribosome.

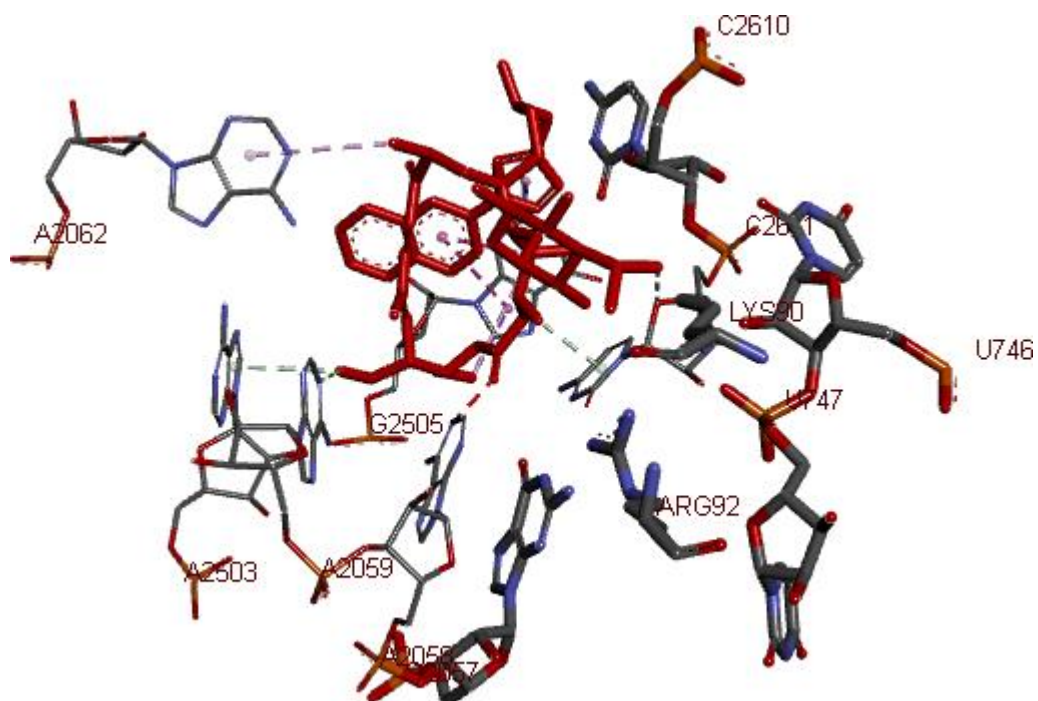

Figure S21: Interactions between (4) (red) and the nucleotides from the binding site from *E. coli* ribosome.



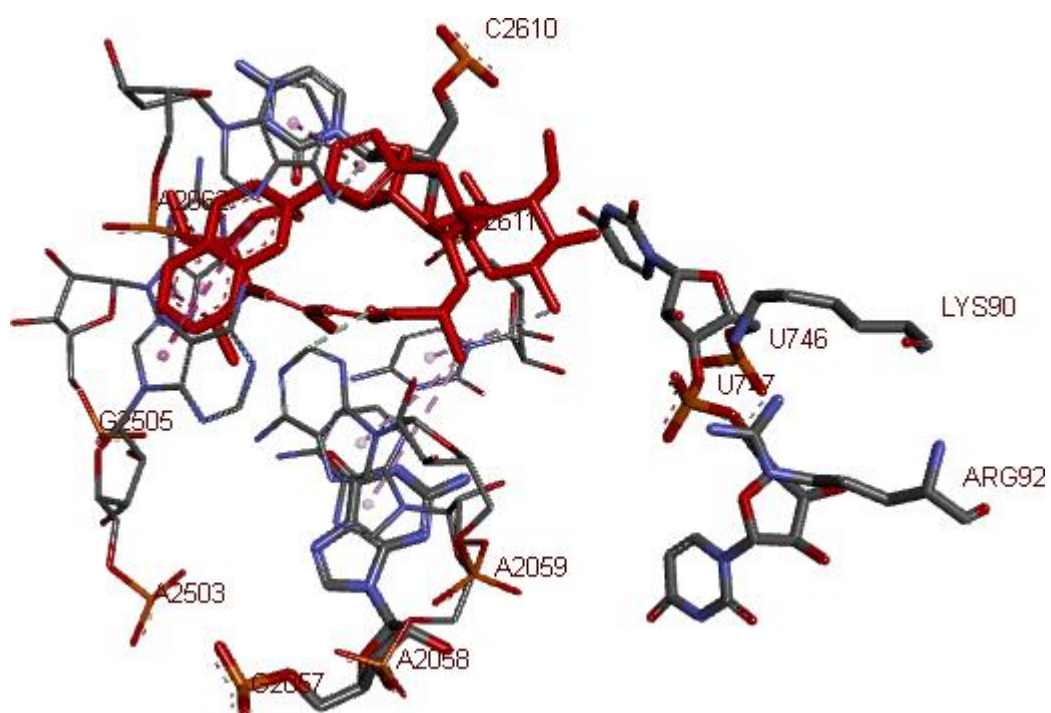

Figure S22: Interactions between (1) (red) and the nucleotides from the binding site from *E. coli* ribosome.

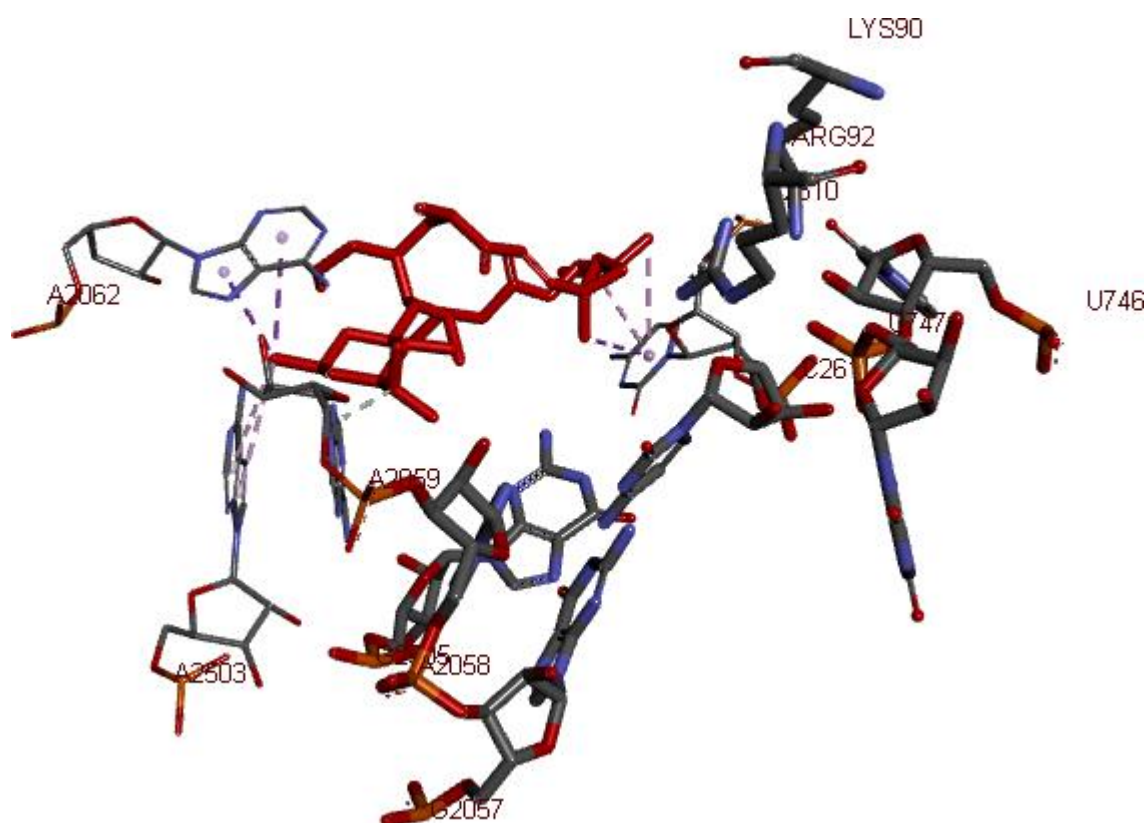

Figure S23: Interactions between rosaramicin (red) and the nucleotides from the binding site from *E. coli* ribosome.

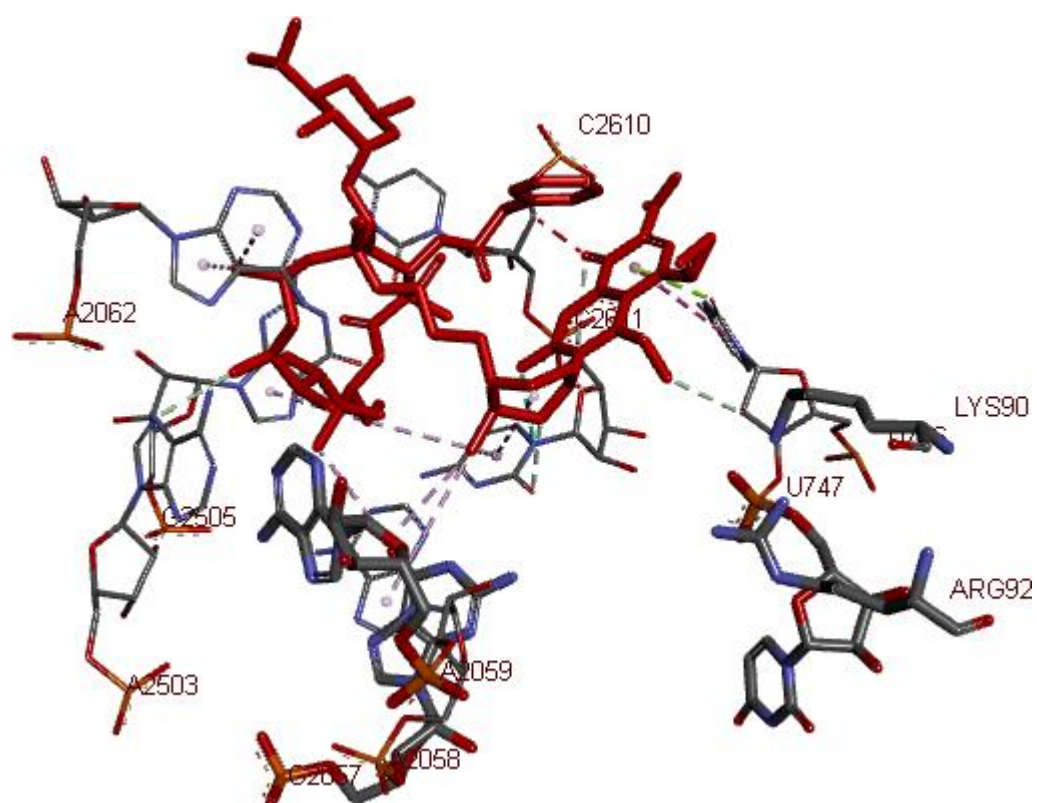

Figure S24: Interactions between **(8)** (red) and the nucleotides from the binding site from *E. coli* ribosome.

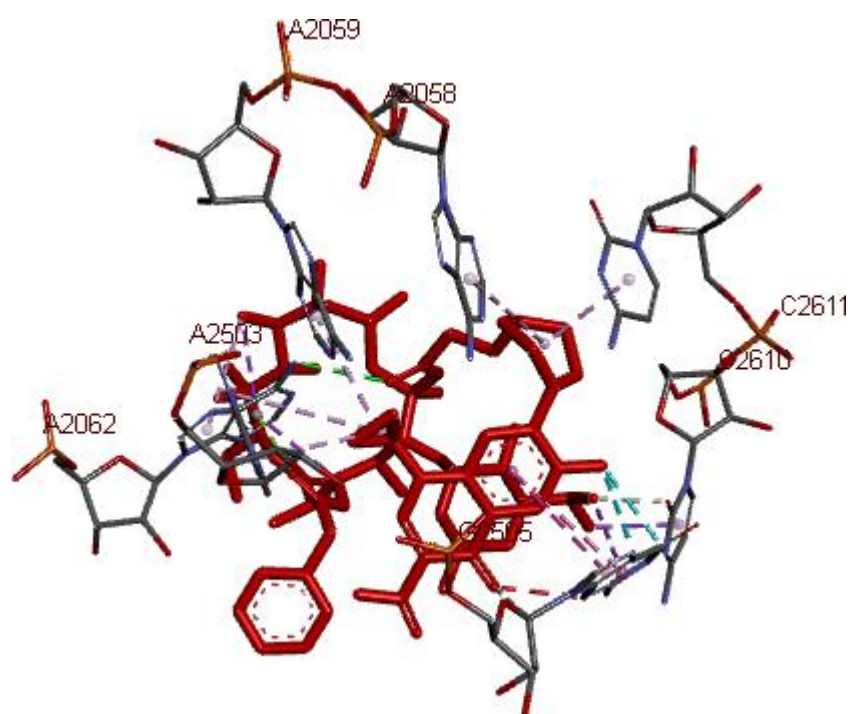

Figure S25: Interactions between **(7)** (red) and the nucleotides from the binding site from *E. coli* ribosome.

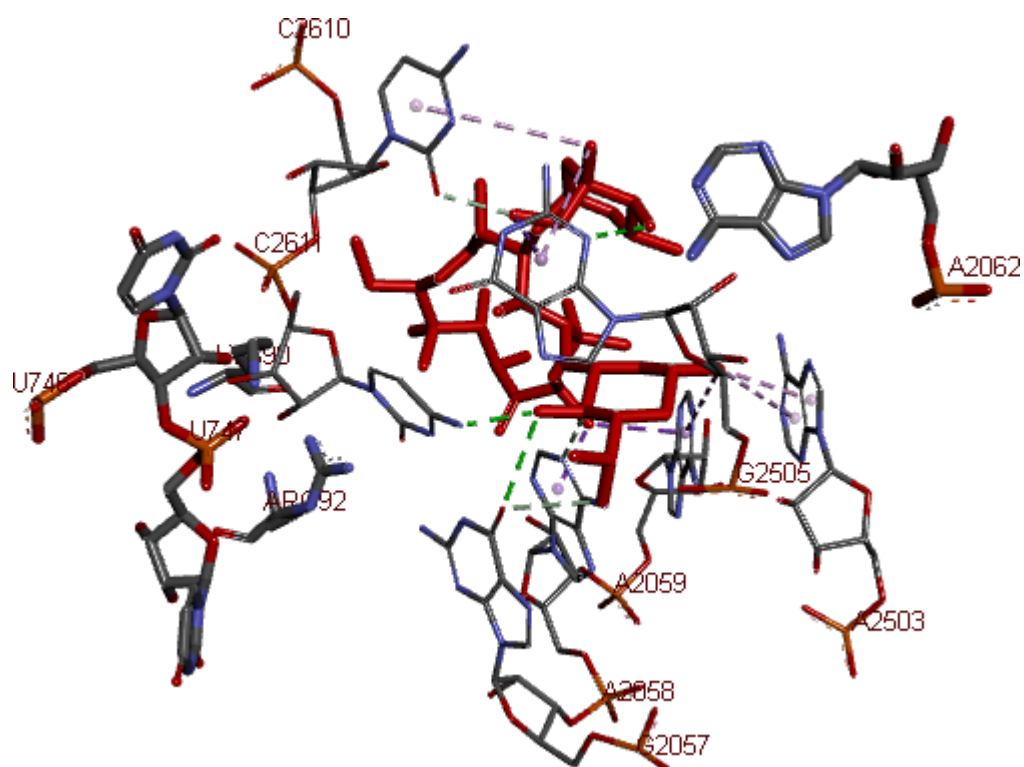

Figure S26: Interactions between erythromycin A (red) and the nucleotides from the binding site from *E. coli* ribosome.

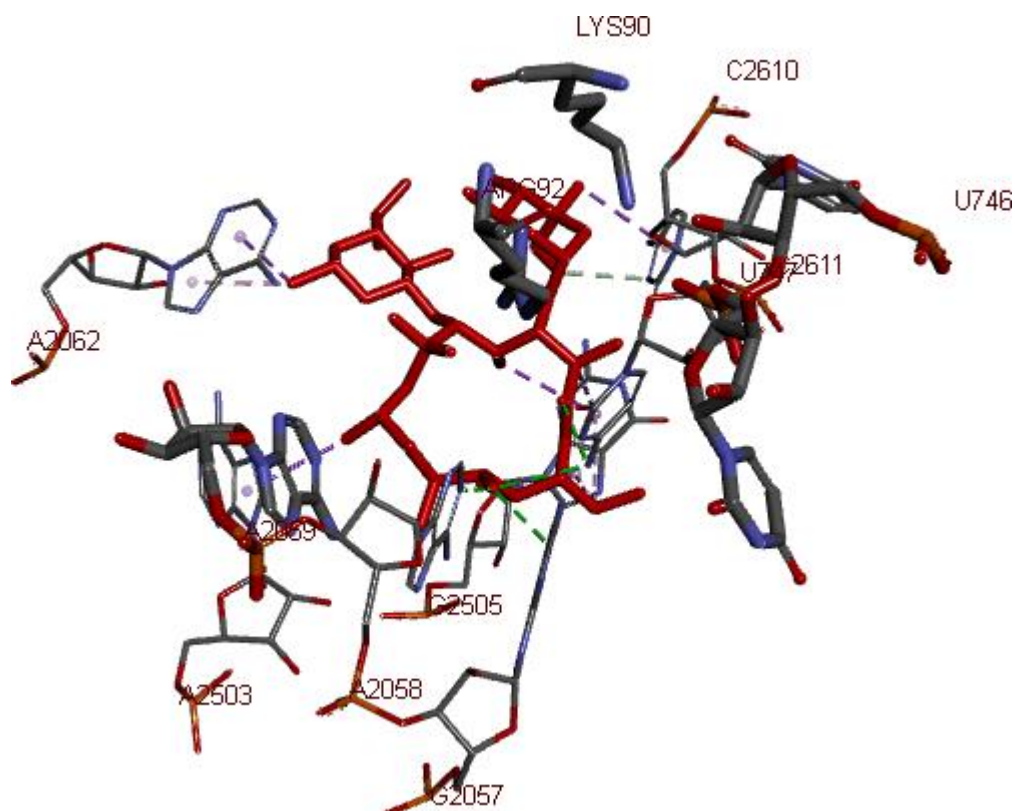

Figure S27: Interactions between erythromycin B (red) and the nucleotides from the binding site from *E. coli* ribosome.

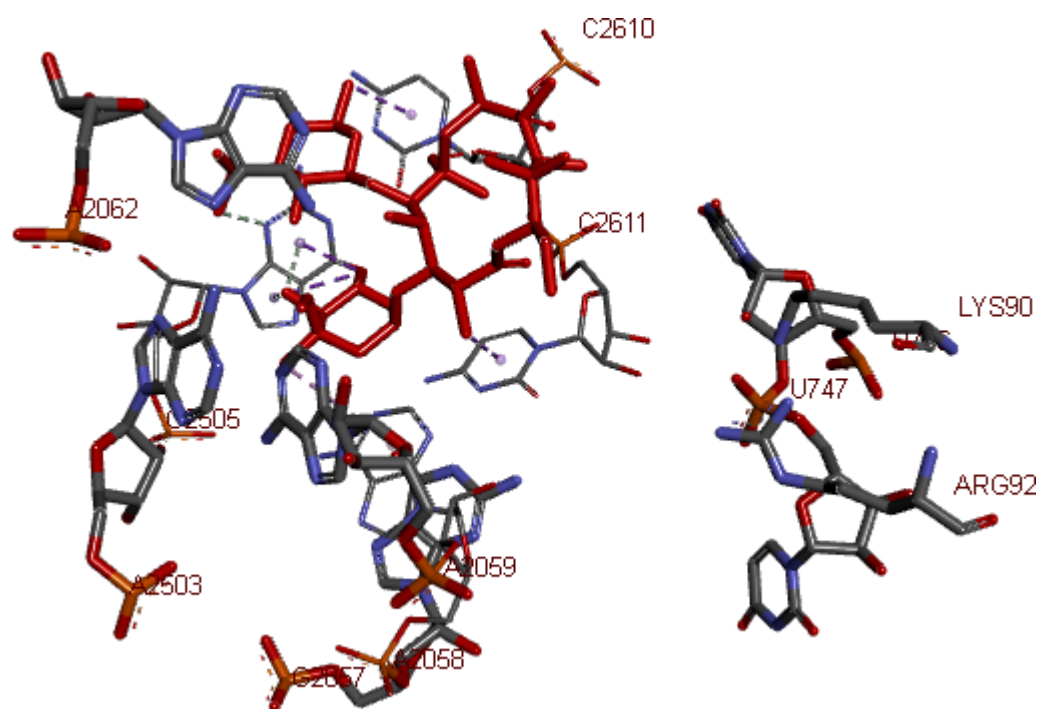

Figure S28: Interactions between erythromycin C (red) and the nucleotides from the binding site from *E. coli* ribosome.

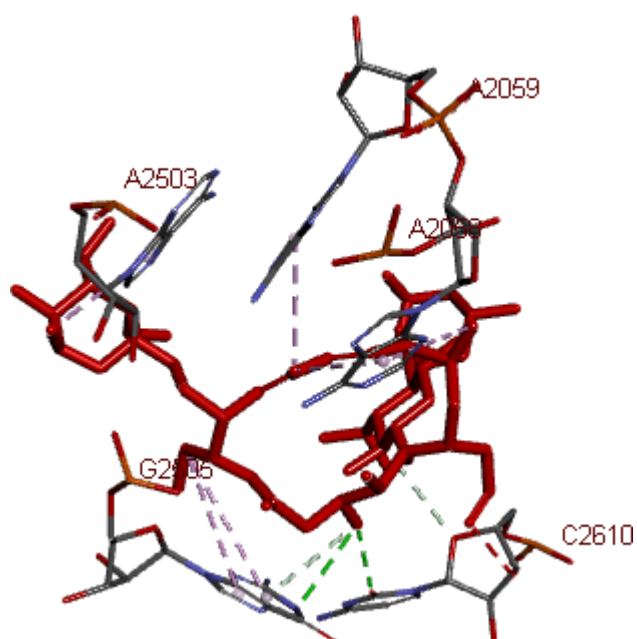

Figure S29: Interactions between tylosin A (red) and the nucleotides from the binding site from *E. coli* ribosome.

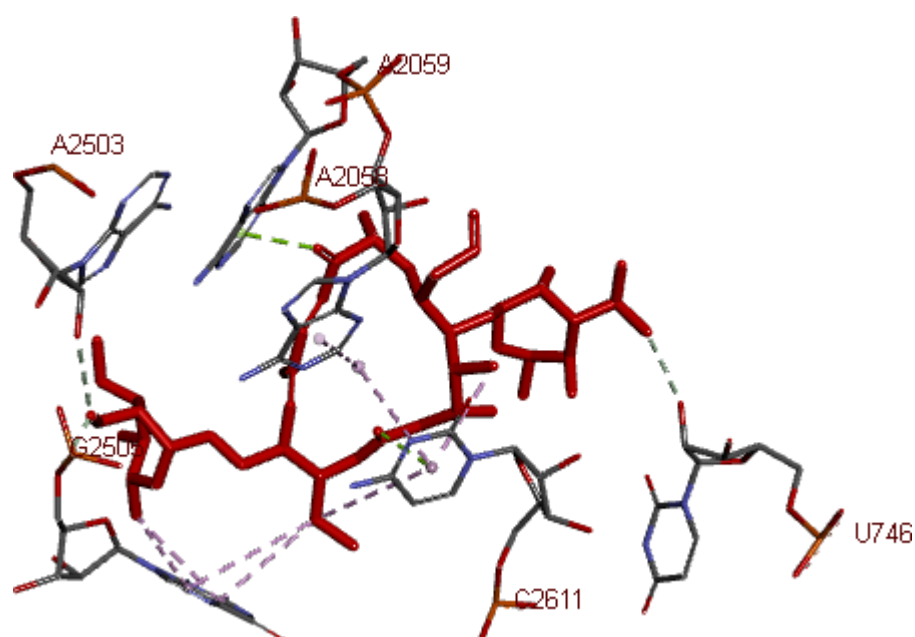

Figure S30: Interactions between tylosin B (red) and the nucleotides from the binding site from *E. coli* ribosome.
